# Supplementary material for: Comparison of Chemical and Sensory Profiles between Cabernet Sauvignon and Marselan Dry Red Wines in China
Source: MDPI journal article supplement (doi:10.3390/foods12051110), 2023-03-05
Supplement: s1 [file s1]

## Supplementary Material

Table S1 Oenological parameters of Cabernet Sauvignon and Marselan dry red wines from five producing regions in China.

| NO | Label | Wineries                | Alcohol (% vol) | Total sugar(g/L) | Total acidity(g/L) | pH   |
|----|-------|-------------------------|-----------------|------------------|--------------------|------|
| 1  | CS-1  | Chateau Yunmo Greatwall | 15.00           | 4.8              | 6.3                | -    |
| 2  | CS-2  | Amethyst Manor          | 14.10           | 3.7              | 5.16               | 3.61 |
| 3  | CS-3  | Martin Vineyard         | 13.00           | 3.7              | 6                  | 3.71 |
| 4  | CS-4  | Grace Vineyard          | 13.90           | 2.8              | 5.6                | 3.65 |
| 5  | CS-5  | Huangkou Winery         | 14.50           | 3.8              | 6.3                | 3.64 |
| 6  | CS-6  | Chateau Huahao          | 14.50           | 2                | 5.9                | 3.75 |
| 7  | CS-7  | Chateau Huahao          | -               | -                | -                  | -    |
| 8  | CS-8  | Chateau Zhongfei        | 14.00           | 3.8              | 6                  | 3.78 |
| 9  | CS-9  | Chateau Zhongfei        | -               | -                | -                  | -    |
| 10 | CS-10 | Tiansai Vineyards       | 14.70           | 2.7              | 6.05               | 3.69 |
| 11 | CS-11 | Tiansai Vineyards       | -               | -                | -                  | -    |
| 12 | CS-12 | CITIC Guoan Winery      | 13.40           | 4.8              | 5.5                | 3.7  |
| 13 | MA-1  | Chateau Yunmo Greatwall | -               | -                | -                  | -    |
| 14 | MA-2  | Amethyst Manor          | 13.50           | 3.5              | 5.64               | 3.57 |
| 15 | MA-3  | Martin Vineyard         | 13.50           | 4                | 5.2                | 3.85 |
| 16 | MA-4  | Grace Vineyard          | 14.00           | 2.9              | 2.9                | 3.5  |
| 17 | MA-5  | Huangkou Winery         | 14.80           | 4                | 6.2                | 3.6  |
| 18 | MA-6  | Chateau Huahao          | 14.90           | 2.2              | 5.8                | 3.78 |
| 19 | MA-7  | Chateau Huahao          | -               | -                | -                  | -    |
| 20 | MA-8  | Chateau Zhongfei        | 13.80           | 3.5              | 6                  | 3.77 |
| 21 | MA-9  | Chateau Zhongfei        | -               | -                | -                  | -    |
| 22 | MA-10 | Tiansai Vineyards       | 15.10           | 3.4              | 5.83               | 3.57 |
| 23 | MA-11 | Tiansai Vineyards       | -               | -                | -                  | -    |
| 24 | MA-12 | CITIC Guoan Winery      | 13.00           | 4.2              | 5.4                | 3.7  |

"-" means the oenological parameters were not collected from the wineries.

Table S2 Quantitative information of major aroma compounds by HS-SPME-GC-MS\*.

| NO | Retention index | Compound                | Quantitative<br>ion (m/z) | Calibration curve |           |                | Linear range (µg/L) |
|----|-----------------|-------------------------|---------------------------|-------------------|-----------|----------------|---------------------|
|    |                 |                         |                           | slope             | intercept | R <sup>2</sup> |                     |
| 1  | 719             | Ethyl acetate           | 43                        | 498.9             | -3077.6   | 0.9989         | 3540.2-141608       |
| 2  | 1009            | Ethyl butanoate         | 71                        | 1152.2            | -16.869   | 0.9995         | 20.52-1026          |
| 3  | 1044            | Ethyl 2-methylbutanoate | 52                        | 412.56            | -0.5746   | 0.9967         | 1.72-68.8           |
| 4  | 1054            | Ethyl 3-methylbutanoate | 88                        | 575.72            | -1.583    | 0.9966         | 3.52-140.8          |
| 5  | 1067            | Isobutanol              | 43                        | 50641             | -5669.6   | 0.9988         | 4365.8-523896       |
| 6  | 1108            | Isoamyl acetate         | 43                        | 385.04            | 133.25    | 0.993          | 136.12-3403         |
| 7  | 1145            | Isoamyl alcohol         | 45                        | 1000000           | -159.45   | 0.9992         | 2552.6-306312       |
| 8  | 1192            | Ethyl hexanoate         | 55                        | 463.42            | 78.977    | 0.997          | 173.44-3468.8       |
| 9  | 1222            | Hexyl acetate           | 88                        | 1.9344            | 1.3326    | 0.9979         | 1.92-38.4           |
| 10 | 1259            | Ethyl heptanoate        | 43                        | 8.492             | -0.0616   | 0.9959         | 0.648-12.96         |
| 11 | 1320            | Ethyl lactate           | 88                        | 2000000           | 29038     | 0.9947         | 41200-247200        |
| 12 | 1326            | 1-Hexanol               | 45                        | 20684             | 1.8352    | 0.999          | 94.8-1422           |
| 13 | 1345            | (Z)-3-Hexenol           | 41                        | 384.4             | -3.5745   | 0.9987         | 5.6-224             |
| 14 | 1365            | Methyl octanoate        | 67                        | 2376.1            | 0.4117    | 0.9884         | 1.96-19.6           |
| 15 | 1376            | Ethyl octanoate         | 74                        | 3274.8            | -226.43   | 0.9867         | 85.6-2054.4         |
| 16 | 1425            | Acetic acid             | 88                        | 0.0544            | 0.2496    | 0.9849         | 0.205-1.025         |
| 17 | 1432            | 1-Heptanol              | 43                        | 14.471            | -6.292    | 0.9913         | 1.04-20.8           |
| 18 | 1436            | Isoamyl hexanoate       | 70                        | 14.108            | 0.4649    | 0.9975         | 0.82-16.4           |
| 19 | 1446            | Furfural                | 70                        | 52.527            | 43.79     | 0.9971         | 23.66-709.8         |
| 20 | 1451            | 2-Ethylhexanol          | 96                        | 313.94            | -3.1501   | 0.9866         | 0.74-29.6           |
| 21 | 1471            | Benzaldehyde            | 57                        | 2062.8            | -15.681   | 0.9964         | 0.68-54.4           |
| 22 | 1514            | Ethyl nonanoate         | 77                        | 2126.1            | 5.1344    | 0.9993         | 12.32-30.8          |
| 23 | 1522            | Ethyl 2-hydroxy-4-      | 88                        | 1786.6            | -24.78    | 0.9992         | 38.24-573.6         |
| 24 | 1527            | Linalool                | 69                        | 44.26             | 0.4271    | 0.9948         | 0.264-13.2          |
| 25 | 1529            | 1-Octanol               | 71                        | 1537.6            | -12.451   | 0.9995         | 1.72-68.8           |
| 26 | 1538            | Isobutyric acid         | 56                        | 255.58            | -1.177    | 0.99922        | 1.566-401           |
| 27 | 1549            | 2,3-Butanediol          | 43                        | 20000000          | 71657     | 0.9964         | 88060-1320900       |
| 28 | 1568            | 5-Methylfurfural        | 45                        | 88.31             | -0.49     | 0.9989         | 2.164-554           |
| 29 | 1561            | Terpinen-4-ol           | 110                       | 190.56            | -0.4983   | 0.9942         | 0.78-6.24           |
| 30 | 1588            | Ethyl 2-furoate         | 71                        | 1637.45           | 1.35      | 0.9618         | 3.611-462.25        |
| 31 | 1608            | Ethyl decanoate         | 95                        | 99.98             | 0.104     | 0.9928         | 4.192-134.14        |
| 32 | 1626            | 1-Nonanol               | 88                        | 63433.41          | 45.12     | 0.9969         | 0.289-592           |
| 33 | 1641            | Isoamyl octanoate       | 56                        | 1569.95           | -0.586    | 0.9993         | 0.498-63.69         |
| 34 | 1646            | Isovaleric acid         | 70                        | 161.11            | 170.63    | 0.9936         | 90.72-2268          |
| 35 | 1650            | Ethyl succinate         | 60                        | 1568.5            | 35.83     | 0.9996         | 47.6-1428           |
| 36 | 1661            | α-Terpineol             | 101                       | 4.9102            | 1.3078    | 0.9924         | 0.82-12.3           |
| 37 | 1681            | Methionol               | 59                        | 16985             | 136.54    | 0.9929         | 406.4-3251.2        |
| 38 | 1698            | 1-Decanol               | 106                       | 1098              | -6.2996   | 0.9989         | 1.6-64              |
| 39 | 1742            | Methyl salicylate       | 70                        | 3679.15           | 1.419     | 0.9988         | 0.33-168            |
| 40 | 1765            | Ethyl benzeneacetate    | 120                       | 463.06            | -0.3661   | 0.9999         | 1.52-18.24          |
| 41 | 1771            | β-Phenethyl acetate     | 91                        | 677.46            | 5.3965    | 0.994          | 4.48-89.6           |

|    |      |                         |     |         |         |        |               |
|----|------|-------------------------|-----|---------|---------|--------|---------------|
| 42 | 1801 | $\beta$ -Damascenone    | 104 | 176.15  | 3.24    | 0.9997 | 0.0996-102    |
| 43 | 1808 | Ethyl dodecanoate       | 43  | 6873.7  | -2.6653 | 0.9991 | 20.4-306      |
| 44 | 1828 | Benzyl alcohol          | 71  | 0.00005 | -0.0008 | 0.996  | 25.44-1526.4  |
| 45 | 1857 | Phenylethyl Alcohol     | 52  | 3000000 | -746.89 | 0.9997 | 4457.6-111440 |
| 46 | 1894 | $\beta$ - Ionone        | 88  | 4.1966x | 0.4119  | 0.9965 | 0.44-7.04     |
| 47 | 1925 | (Z)-Oaklactone          | 43  | 369.85  | 16.152  | 0.9907 | 19.44-116.64  |
| 48 | 1946 | Phenol                  | 43  | 451.12  | -0.1458 | 0.9901 | 1.6-32        |
| 49 | 1984 | Octanoic acid           | 45  | 111.54  | 0.336   | 0.9911 | 5.007-640.94  |
| 50 | 2046 | Ethyl cinnamate         | 55  | 228.32  | 0.204   | 0.9981 | 12.03-385     |
| 51 | 2175 | Ethyl hexadecanoate     | 43  | 315.96  | -0.56   | 0.9997 | 0.418-107     |
| 52 | 2257 | <i>n</i> -Decanoic acid | 88  | 1065.4  | -99.246 | 0.9839 | 60.96-1143    |

\* A synthetic matrix (12% ethanol/water solution containing 2 g/L glucose and 5.3 g/L tartaric acid, pH = 3.5) was used to establish the calibration curves. The standard solution was diluted into fifteen levels. Aroma standards of each level were extracted and analyzed in triplicate under the same conditions as the samples.



Table S3 Quantitative information for aliphatic lactones by SPE-GC-QqQ-MS/MS\*.

| Compound        | Ion1 (m/z) | Ion2 (m/z) | Calibration curves |           |        | Linear range (µg/L) |
|-----------------|------------|------------|--------------------|-----------|--------|---------------------|
|                 |            |            | Slope              | intercept | R2     |                     |
| Butyrolactone   | 86-42      | -          | 9235.7             | -2430.2   | 0.9926 | 172.422-44140       |
| Pantolactone    | 130-71     | 71-71      | 317398             | -29.468   | 0.9902 | 45.313-1450         |
| γ-Hexalactone   | 114-85     | 114-55     | 5144.5             | -3.2914   | 0.9938 | 2.188-560           |
| γ-Octalactone   | 124-109    | 124-95     | 7698.4             | -0.3032   | 0.9988 | 0.195-200           |
| δ-Octalactone   | 99-71      | 114-71     | 12.194x            | 0.5866    | 0.9956 | 0.469-30            |
| γ-Nonalactone   | 128-95     | 128-71     | 9.0372             | -1.3347   | 0.9994 | 0.820-105           |
| γ-Decalactone   | 128-95     | 128-71     | 143.05             | -1.2665   | 0.9979 | 0.195-50            |
| δ-Decalactone   | 152-97     | 99-71      | 21.76              | -1.4659   | 0.998  | 0.8595-55           |
| γ-Undecalactone | 128-95     | 128-71     | 155.96             | 0.1883    | 0.9983 | 0.225-115           |
| γ-Dodecalactone | 128-95     | 128-71     | 216.97x            | 0.4381    | 0.9932 | 0.186-95            |
| δ-Dodecalactone | 114-73     | 99-71      | 24.998             | 0.7568    | 0.9881 | 0.234-60            |

\* A synthetic matrix (12% ethanol/water solution containing 2 g/L glucose and 5.3 g/L tartaric acid, pH = 3.5) was used to establish the calibration curves. The standard solution was diluted into fifteen levels. Aroma standards of each level were extracted and analyzed in triplicate under the same conditions as the samples.

Table S4 Quantitative information for phenolic compounds by HPLC-QqQ-MS/MS.

| NO | Retention time<br>(min) | Compound               | Ion (m/z)    | Calibration curve |           |                | Linear range (mg/L) |
|----|-------------------------|------------------------|--------------|-------------------|-----------|----------------|---------------------|
|    |                         |                        |              | slope             | intercept | R <sup>2</sup> |                     |
| 1  | 5.7                     | Malvidin-3-O-glucoside | 493-331      | 4.00E-05          | -37.441   | 0.9945         | 10-250              |
| 2  | 5.7                     | Malvidin-3-O-glucoside | 493-331      | 7.00E-07          | 1.5203    | 0.9900         | 10-100              |
| 3  | 4.48                    | 4-Hydroxybenzoic acid  | 137-93:3.4   | 0.0001            | -6.0155   | 0.9931         | 1-50                |
| 4  | 2.7                     | Protocatechuic acid    | 153-109:2    | 6.00E-05          | -0.4063   | 0.9927         | 1-10                |
| 5  | 4.4                     | Gentisic acid          | 153-109:3.3  | 0.0002            | -1.0746   | 0.9967         | 1-12                |
| 6  | 9.6                     | 4-Hydroxycinnamic acid | 163-119:7.2  | 2.00E-06          | 0.1886    | 0.9913         | 0.1-20              |
| 7  | 12.3                    | 3-Hydroxycinnamic acid | 163-119:9.7  | 3.00E-05          | -0.4208   | 0.9897         | 1-4                 |
| 8  | 6.1                     | Vanillic acid          | 167-152:4.4  | 0.0022            | 0.1629    | 0.9867         | 0.1-10              |
| 9  | 1.5                     | Gallic acid            | 169-125      | 0.0002            | -8.1      | 0.9736         | 1-100               |
| 10 | 6.4                     | Caffeic acid           | 179-135:4.3  | 3.00E-05          | -6.7603   | 0.9875         | 10-80               |
| 11 | 11.9                    | Ferulic acid           | 193-134:9.2  | 0.0001            | -1.5254   | 0.9946         | 1-40                |
| 12 | 12.5                    | Sinapic acid           | 223-149:9.9  | 0.0004            | 0.0703    | 0.9983         | 0.1-20              |
| 13 | 5.0                     | Catechin               | 289-123:3.2  | 0.0005            | -5.9987   | 0.9874         | 1-125               |
| 14 | 8.4                     | Epicatechin            | 289-123:6    | 0.0004            | -5.9383   | 0.9784         | 1-100               |
| 15 | 22.4                    | Quercetin              | 301-151:18.6 | 3.00E-05          | -0.1961   | 0.9993         | 0.1-5               |
| 16 | 12.3                    | Dihydroquercetin       | 303-125:9.5  | 8.00E-05          | -0.0922   | 0.9991         | 0.1-20              |
| 17 | 2.1                     | Gallocatechin          | 305-125:1.7  | 0.0007            | 5.5047    | 0.9865         | 1-160               |
| 18 | 4.4                     | Epigallocatechin       | 305-125:2.7  | 3.00E-06          | -0.0686   | 0.9416         | 0.1-5               |
| 19 | 17.7                    | Myricetin              | 317-151:14.3 | 6.00E-05          | -0.1415   | 0.9989         | 0.1-5               |
| 20 | 27.9                    | Chlorogenic acid       | 353-191:4    | 3.00E-05          | -0.2521   | 0.9177         | 0.1-10              |
| 22 | 12.6                    | ECG                    | 441-289:9.8  | 0.0002            | -2.2685   | 0.9854         | 1-100               |
| 22 | 17.8                    | Kaempferol-galactoside | 447-255:12.9 | 5.00E-05          | 0.2339    | 0.987          | 1-10                |
| 23 | 17.7                    | Quercetin-rhamnoside   | 447-300:14.5 | 3.00E-05          | 0.1314    | 0.9854         | 0.1-5               |
| 24 | 8.0                     | EGCG                   | 457-169:5.03 | 6.00E-05          | -1.9199   | 0.9932         | 1-125               |
| 25 | 14.6                    | Quercetin-galactoside  | 463-300:10.6 | 5.00E-05          | -0.2203   | 0.9941         | 0.1-10              |
| 26 | 15.2                    | Quercetin-glucoside    | 463-300:12   | 5.00E-05          | -1.0971   | 0.9983         | 1-40                |
| 27 | 14.8                    | Quercetin-glucuronide  | 477-301:11.8 | 7.00E-05          | 0.3239    | 0.9853         | 1-20                |
| 28 | 12.2                    | Myricetin-galactoside  | 479-316:8.6  | 3.00E-05          | -0.1556   | 0.9891         | 1-10                |
| 29 | 5.7                     | Procyanin B1           | 577-407:2.5  | 0.0004            | -1.9162   | 0.9937         | 1-50                |
| 30 | 6.8                     | Procyanin B2           | 577-407:4.4  | 0.0006            | -1.4484   | 0.9937         | 1-40                |

Table S5 Preparation of reference standards for each sensory attribute\*.

| NO | Attributes              | References                                                                                                       |
|----|-------------------------|------------------------------------------------------------------------------------------------------------------|
| 1  | Blackberry              | Dissolve 20 $\mu$ L of blackberry essence in 20 ml of simulated wine solution.                                   |
| 2  | Blueberry               | Dissolve 20 $\mu$ L of blueberry essence in 20 ml of simulated wine solution.                                    |
| 3  | Strawberry              | Dissolve 20 $\mu$ L of strawberry essence in 20 ml of simulated wine solution.                                   |
| 4  | Cherry                  | Dissolve 20 $\mu$ L of cherry essence in 20 ml of simulated wine solution.                                       |
| 5  | Raspberry               | 0.35 g of raspberry was treated with liquid nitrogen, and the crumbs were dissolved in 20 ml of simulated wine.  |
| 6  | Mulberry                | 0.35 g of mulberry was treated with liquid nitrogen, and the crumbs were dissolved in 20 ml of simulated wine.   |
| 7  | Banana                  | Dissolve 20 $\mu$ L of banana essence in 20 ml of simulated wine solution.                                       |
| 8  | Apple/Pear              | Dissolve 20 $\mu$ L of apple and pear essence in 20 ml of simulated wine solution.                               |
| 9  | Peach/Apricot           | Dissolve 20 $\mu$ L of blueberry essence in 20 ml of simulated wine solution.                                    |
| 10 | Sophora flower          | Dissolve 20 $\mu$ L of sophora flower perfume in 20 ml of simulated wine solution.                               |
| 11 | Rose                    | Dissolve 20 $\mu$ L of rose essence in 20 ml of simulated wine solution.                                         |
| 12 | Violet                  | Le nez du vin                                                                                                    |
| 13 | Dried/Preserved Fruit   | Raisin                                                                                                           |
| 14 | Herbaceous              | 0.35 g of herbaceous was treated with liquid nitrogen, and the crumbs were dissolved in 20 mL of simulated wine. |
| 15 | Toasted hazelnuts/toast | Le nez du vin                                                                                                    |
| 16 | Honey                   | Dissolve 20 $\mu$ L of honey essence in 20 ml of simulated wine solution.                                        |
| 17 | Baked sweet potatoes    | Dissolve 20 $\mu$ L of baked sweet potato essence in 20 ml of simulated wine solution.                           |
| 18 | Oak                     | Oak chips                                                                                                        |
| 19 | Tannin acid             | Different concentrations of tannic acid aqueous solutions (0.5g/L, 1g/L, 2g/L, 2.5g/L, 4g/L, 5g/L)               |

\* The model solution was prepared using 12% ethanol/water solution, pH = 3.7.
